# Supplementary material for: Theoretical investigations of the 2D chiral segregation induced by external directional fields
Source: Royal Society of Chemistry journal article supplement (doi:10.1039/c5ra15192a), 2015-01-01
Supplement: c5ra15192a1.pdf [file c5ra15192a1.pdf]

Electronic Supplementary Information

**Theoretical Investigations of the 2D Chiral Segregation Induced by External Directional Fields**

Aleksandra Woszczyk and Paweł Szabelski

*Department of Theoretical Chemistry, Maria-Curie Skłodowska University,*

*Pl. M.C. Skłodowskiej 3, 20-031 Lublin, Poland.*

**1. Simulation details**

The simulation algorithm was organized as follows. In the first step  $N$  molecules of a selected type (S, R) were distributed randomly on the lattice. Next, the adsorbed layer was equilibrated by a series of attempts to move each molecule to a new position ( $n$ ). To that end the selected molecule was randomly translated and the four allowed orientations from Fig. 1 were probed. For each of these trial configurations,  $l$  the corresponding potential energy was calculated using the simple summation

$$E_{nl} = \omega \sum_{i=1}^4 \sum_{j=1}^4 s_{ij} - mB \cos(\theta_l) \quad \text{for} \quad l=1..4 \quad (1)$$

where the first sum runs over all segments of the selected molecule and the second sum runs over nearest neighbors of the segment  $i$  on a square lattice. The occupation variable  $s_{ij}$  is equal to 1 if the sites  $i$  and  $j$  are occupied by segments belonging to a pair of neighboring molecules. Otherwise it is equal to zero. In the next step of the simulation the associated Rosenbluth factor:

$$w_n = \sum_{l=1}^4 \exp[-\beta E_{nl}] \quad (2)$$

was determined for the new position and one of the trial configurations, say  $x$ , was chosen with probability equal to

$$p_{nx} = \exp[-\beta E_{nx}] / w_n \quad (3)$$

where  $\beta = 1/kT$  and  $k$  and  $T$  have their usual meanings. The same procedure (see Eqs. 2 and 3) was used to calculate the Rosenbluth factor for the old position,  $w_o$  including the original configuration of the selected molecule. To accept or reject the new configuration  $x$  the transition probability was calculated:

$$P = \min[1, w_n / w_o] \quad (4)$$

and it was compared with a randomly generated number  $r \in (0,1)$ . If  $r < P$  the move was accepted; otherwise the molecule was left in the original configuration. All of the results described here were obtained for  $\omega = -1$  and  $m = 1$ , assuming that  $m$ ,  $B$ ,  $\omega$ ,  $k$  and  $T$  are dimensionless parameters. To equilibrate the systems at a given value of  $B$  we used  $2 \times 10^7$  MC steps per molecule, where one MC step is a single attempt to move (and rotate) a molecule to a new position on the lattice. The same set of parameters was used to simulate the

overlayers comprising five-membered prochiral molecules discussed in the following section. The results of this study are averages over ten independent systems replicas.

## 2. Snapshots of the enantiopure overlayers comprising five-membered molecules

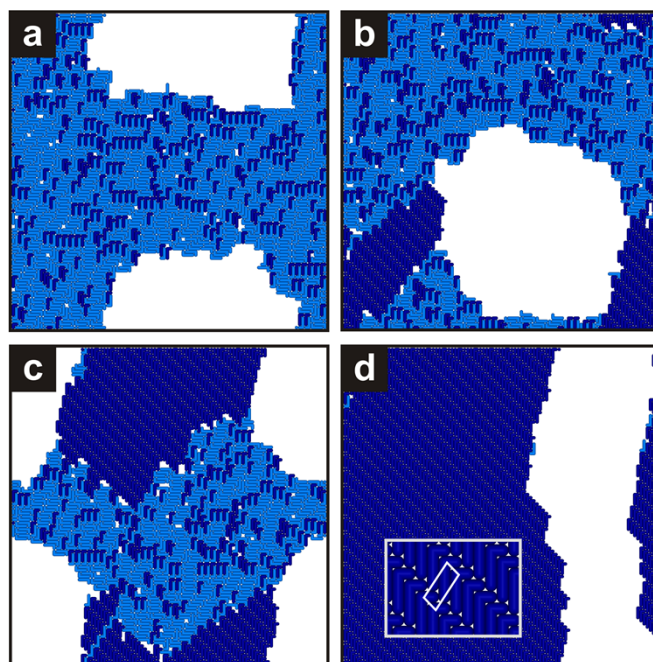

**Figure S1.** Snapshots of the enantiopure overlayer comprising 1400 molecules **1(S)** simulated for different strengths of the external field,  $B$ : a) 0.00, b) 0.36 c) 0.37 and d) 0.40;  $T=0.5$ . The inset in panel d) presents a magnified fragment of the overlayer in which the parallelogram ( $\sqrt{2} \times \sqrt{13}$ ) unit cell is marked in white. The molecules with upward orientation are colored in dark blue.

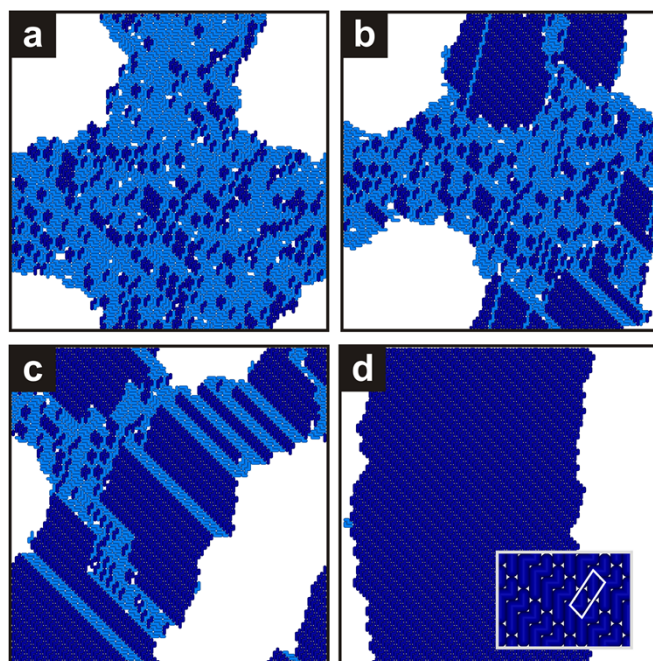

**Figure S2.** Snapshots of the enantiopure overlayer comprising 1400 molecules **2(S)** simulated for different strengths of the external field,  $B$ : a) 0.00, b) 0.21 c) 0.25 and d) 0.30;  $T=0.5$ . The inset in panel d) presents a magnified fragment of the overlayer in which the parallelogram ( $\sqrt{2} \times \sqrt{13}$ ) unit cell is marked in white. The molecules with upward orientation are colored in dark blue.

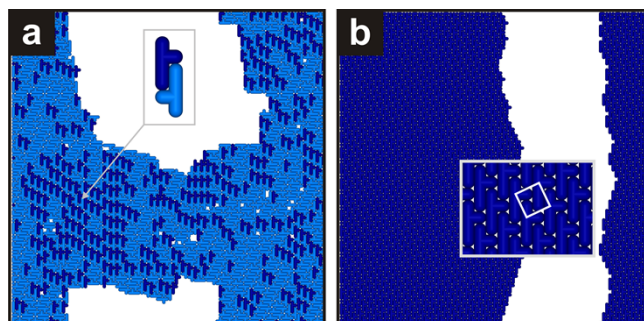

**Figure S3.** Snapshots of the enantiopure overlayer comprising 1400 molecules **3(S)** simulated for different strengths of the external field,  $B$ : a) 0.41 and b) 1.50;  $T=0.5$ . The inset in panel a) shows the bimolecular configuration responsible for the stabilization of molecules with downward orientation (light blue). The inset in panel b) is a magnified fragment of the overlayer in which the square ( $\sqrt{5} \times \sqrt{5}$ ) unit cell is marked in white. The molecules with upward orientation are colored in dark blue.

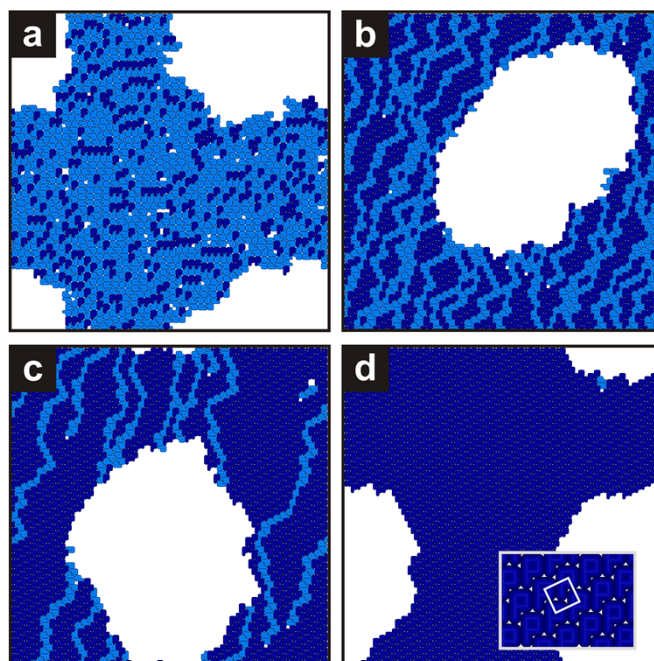

**Figure S4.** Snapshots of the enantiopure overlayer comprising 1400 molecules **4(S)** simulated for different strengths of the external field,  $B$ : a) 0.10, b) 0.32 c) 0.43 and d) 0.58;  $T=0.5$ . The inset in panel d) presents a magnified fragment of the overlayer in which the square ( $\sqrt{5} \times \sqrt{5}$ ) unit cell is marked in white. The molecules with upward orientation are colored in dark blue.

## 2. Snapshots of the racemic overlayers comprising five-membered molecules

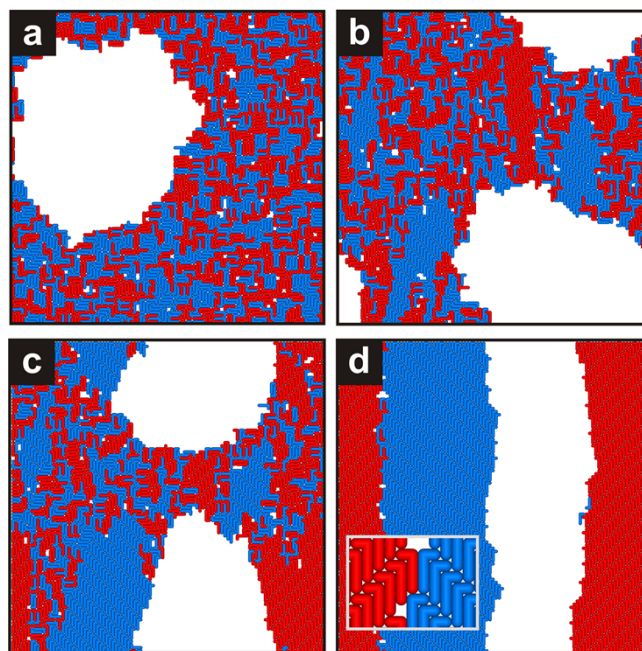

**Figure S5.** Snapshots of the racemic overlayer comprising 700 S + 700 R molecules **1** simulated for different strengths of the external field,  $B$ : a) 0.10, b) 0.36 c) 0.37 and d) 0.40;  $T=0.5$ . The inset in panel d) presents a magnified fragment of the overlayer.



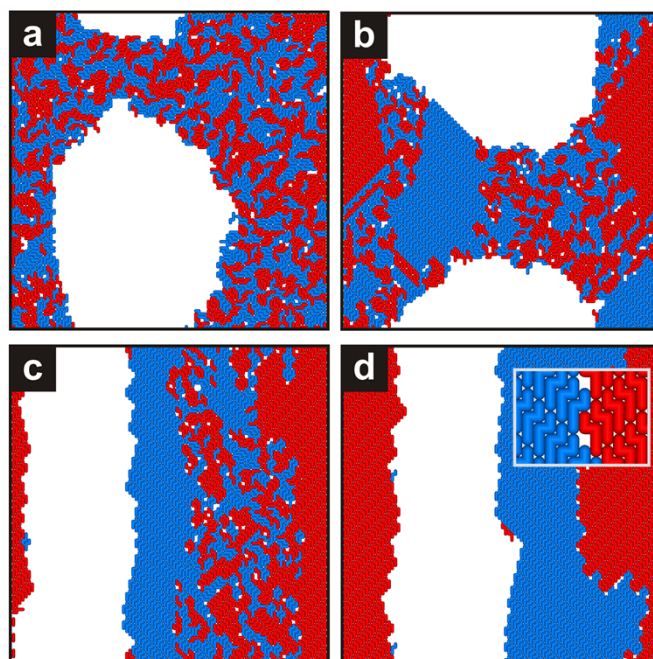

**Figure S6.** Snapshots of the racemic overlayer comprising 700 S + 700 R molecules **2** simulated for different strengths of the external field,  $B$ : a) 0.10, b) 0.60 c) 0.66 and d) 0.80;  $T=0.5$ . The inset in panel d) presents a magnified fragment of the overlayer.

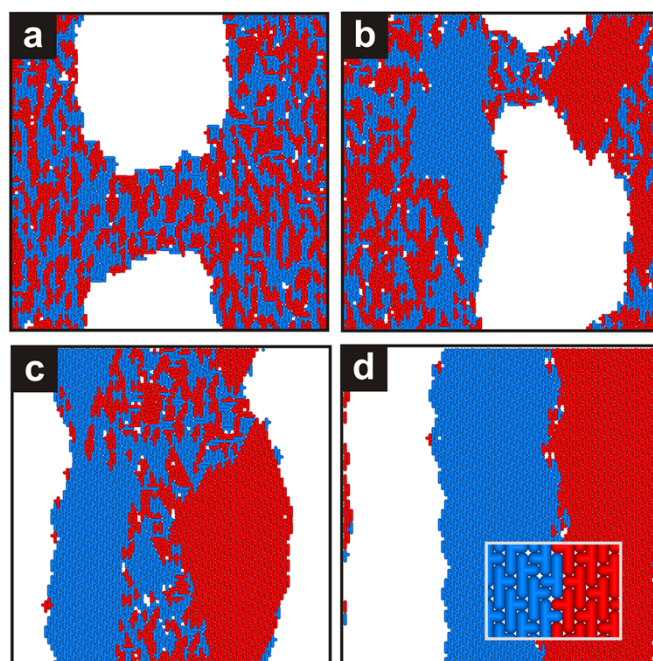

**Figure S7.** Snapshots of the racemic overlayer comprising 700 S + 700 R molecules **3** simulated for different strengths of the external field,  $B$ : a) 0.20, b) 0.51 c) 0.55 and d) 0.74. The inset in panel d) presents a magnified fragment of the overlayer.

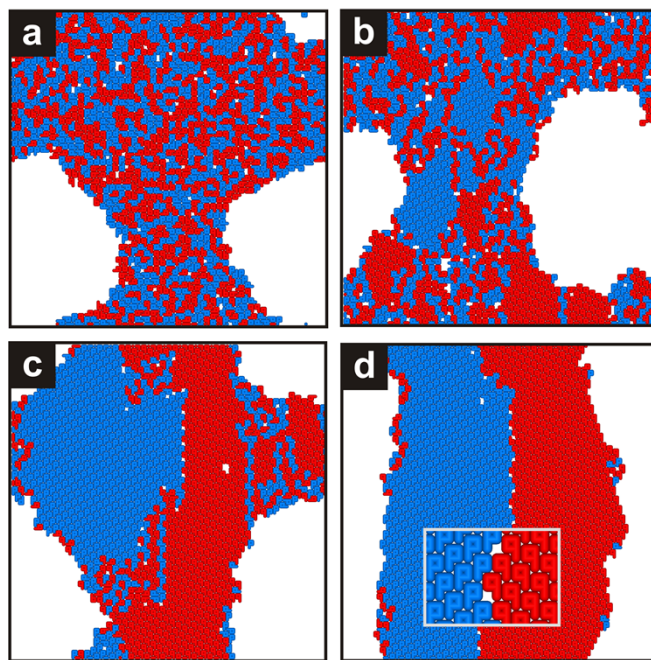

**Figure S8.** Snapshots of the racemic overlay comprising 700 S + 700 R molecules **4** simulated for different strengths of the external field,  $B$ : a) 0.2, b) 0.87 c) 0.90 and d) 1.00;  $T=0.5$ . The inset in panel d) presents a magnified fragment of the overlay.

### 3. Statistics of molecules with different orientations

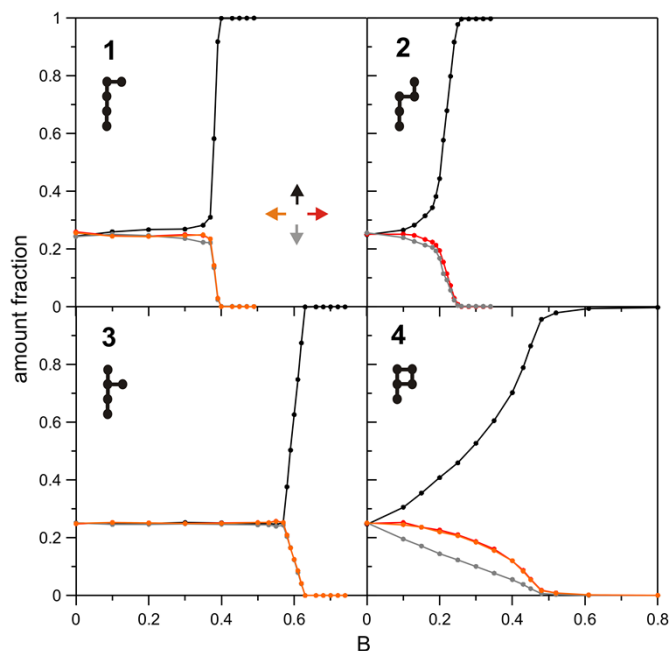

**Figure S9.** Effect of the external field on the amount fraction of molecules **1-4** with the orientations indicated by the colored arrows from panel 1; enantiopure overlays, 1400 S;  $T=0.5$ .

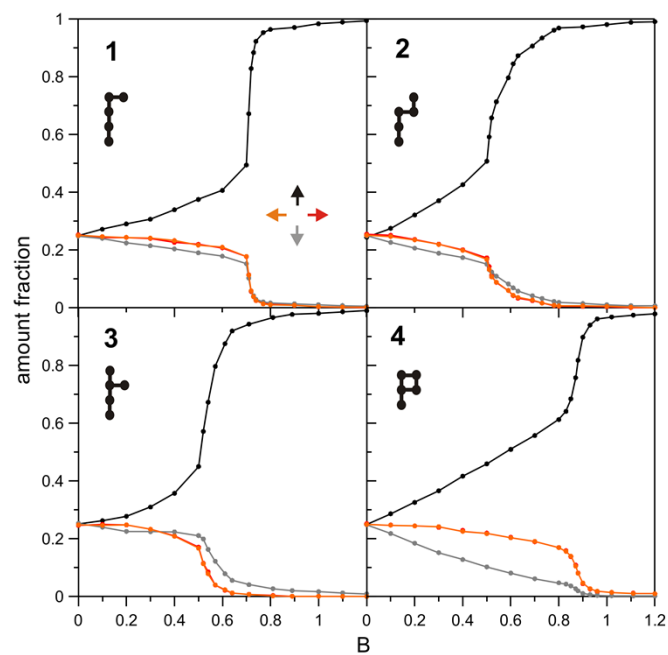

**Figure S10.** Effect of the external field on the amount fraction of molecules **1-4** with the orientations indicated by the colored arrows from panel 1; racemic mixtures, 700R + 700S;  $T=0.5$ .
